# Supplementary material
Source: PubMed Central journal article supplement (PMC4508422)
Supplement: JCM.00943-15_zjm999094403so1.pdf [file JCM.00943-15_zjm999094403so1.pdf]

## Supplemental material

Table S1 Reference strains used in the CRV-MS method design

| Virus species     | Virus types           | Genogroup | Serotype | Strains                                 | GenBank accession No. |
|-------------------|-----------------------|-----------|----------|-----------------------------------------|-----------------------|
| human rhinovirus  |                       | A         |          | HRV-A28_p1292_s6470_2000                | JQ747751              |
|                   |                       | B         |          | HRV-B06_p1159_sR2069_2009               | JQ837717              |
|                   |                       | C         |          | HRV-C22_p1268_s3839_1999                | JN621242              |
| Human enterovirus | EV71                  | B         |          | 2258-CVA-79                             | AF135880              |
|                   |                       | C         |          | SHZH98                                  | AF302996              |
|                   |                       | A         |          | G-10                                    | U05876                |
| Human adenovirus  | Coxsackievirus<br>A16 | B         |          | shzh00-2                                | AY895127              |
|                   |                       | A         |          |                                         | AC_000005             |
|                   |                       | B         |          | human/ARG/ak38_AdV7h/2003/<br>7[P7H7F7] | JX423386              |
|                   |                       | B1        |          | GB                                      | NC_011203             |
|                   |                       | B2        |          | Slobitski                               | NC_011202             |
|                   |                       | C         |          |                                         | NC_001405             |
|                   |                       | D         |          | Hicks; NIAID V-209-003-014              | NC_010956             |
| Influenza virus   |                       | A         | H1N1     | Beijing/132/2010(H1N1)                  | KF918706              |
|                   |                       |           | H1N1     | Uberlandia/444/2006(H1N1)               | KF918355              |
|                   |                       |           | H1N1     | California/04/2009                      | FJ966082              |
|                   |                       |           | H3N2     | Ontario/001/2013                        | KC526207              |
|                   |                       |           | B        | B/Christchurch/54/2007                  | CY150665.1            |
|                   |                       |           | E        |                                         | NC_003266             |

---

|                             |    |                        |           |
|-----------------------------|----|------------------------|-----------|
| Human coronavirus 229E      |    |                        | NC_002645 |
| Human coronavirus OC43      |    | ATCC VR-759            | NC_005147 |
| Human coronavirus NL63      |    | Amsterdam I            | NC_005831 |
| Human coronavirus HKU1      |    |                        | NC_006577 |
| Human metapneumovirus       | A  | CAN97-83               | NC_004148 |
|                             | B  | HMPV/USA/C2-175/2005/B | KC562219  |
| Respiratory syncytial virus | A  | RSVA/GN435/11          | JX627336  |
|                             | B  | B1                     | NC_001781 |
| Human parainfluenza virus   | 1  | HPIV1/USA/32193A/2010  | KF687315  |
|                             | 2  |                        | AB176531  |
|                             | 3  | HPIV3/MEX/1110/2004    | KF687321  |
|                             | 4a | HPIV-4a_QPID08-0015    | KF878965  |
|                             | 4b | 04-13                  | JQ241176  |
| Human bocavirus             | 1  | ZJ92                   | JX887482  |
|                             | 2  | W298                   | FJ948860  |
|                             | 3  | IM10                   | GQ867667  |
|                             | 4  | HBoV4-NI-385           | NC_012729 |

---

Table S2 Sequences and molecular weights of unextended (UEP) and extended primers (EP) to detect Primers used in the CRV-MS method

| ID*              | Target region | Sense Primer <sup>#</sup>           | Anti-sense Prime <sup>#</sup>       | UEP                          | Amplicon size(bp) | UEP, Da | Extension | EP, Da |
|------------------|---------------|-------------------------------------|-------------------------------------|------------------------------|-------------------|---------|-----------|--------|
| HRV              | 5'UTR         | ACGTTGGATGTGTTCT<br>AGCCTGCGTYGCTG  | ACGTTGGATGAACACG<br>GACACCCAAYGTAG  | CTGAATGCCGGCCC               | 244               | 4224.8  | C         | 4471.9 |
| HEV              | 5'UTR         | ACGTTGGATGGTGTGT<br>CGTAAAYGGGRAACT | ACGTTGGATGCTCAAT<br>TGTCACCATASGCAG | TGCAGCGGAACCG<br>AC          | 119               | 4587.0  | T         | 4914.1 |
| AdV              | Hexon         | ACGTTGGATGCTTGTAI<br>ACGTAGGGYCAGG  | ACGTTGGATGTTACYA<br>CCGTCAGTGYYAAC  | TTGTGGTCCCCTGA<br>TC         | 146               | 4879.2  | T         | 5150.4 |
| Flu-A            | MP            | ACGTTGGATGTCTACG<br>CTGKAGTCCTCGCT  | ACGTTGGATGGACCAA<br>TCTTGTCAYCTCTG  | AGGAGCTGGGCAC<br>GGT         | 106               | 4987.2  | G         | 5234.4 |
| Flu-A H1N1       | HA            | ACGTTGGATGCTGAGR<br>GAGCAATTGAGTIC  | ACGTTGGATGTCCCGT<br>TATGGGAGCYTGAT  | CCTTCCAGAGGTT<br>CGAAATATTC  | 141               | 7302.8  | C         | 7549.9 |
| Flu-A H1N1 pdm09 | HA            | ACGTTGGATGTGAATC<br>GTGGTAGTCCAAAG  | ACGTTGGATGGGTAAA<br>GAGTTCYACCACCT  | TGTCGCATTGTAAG<br>TCCAAAT    | 161               | 6420.2  | G         | 6667.4 |
| Flu-A H3N2       | HA            | ACGTTGGATGAGTGCT<br>TTTGAGATCTGCTG  | ACGTTGGATGGCGGGT<br>TTCATAGAYAATGG  | ATACCAACCCTGAA<br>ACCG       | 129               | 5421.6  | T         | 5692.8 |
| Flu-B            | MP            | ACGTTGGATGAGAAG<br>GCCATGAYAGCTCAG  | ACGTTGGATGAGCCCT<br>GTGTGYATGTGATG  | GTAGAGGTCAATGC<br>AAGTAAACT  | 161               | 7433.9  | A         | 7705.1 |
| HCoV-229E        | N             | ACGTTGGATGACCTTC<br>CAAGYTTGTTCACT  | ACGTTGGATGATGGGC<br>TGATGKATCTGAAC  | CCCTACAAAGGACT<br>ATCAACAAG  | 119               | 6994.6  | C         | 7281.8 |
| HCoV-NL63        | N             | ACGTTGGATGGGAARC<br>TTGTCCCTATTGG   | ACGTTGGATGGCATAC<br>GCCAACGCTCTTGA  | ATTGATGAGCAGAT<br>TGGTT      | 98                | 5897.9  | G         | 6185.1 |
| HCoV-HKU 1       | N             | ACGTTGGATGACAGAG<br>TCTTCTACARAAGG  | ACGTTGGATGGCTGRT<br>ACTCAGCACATTTT  | AGGATCCGTAGCAA<br>GTAAACTATG | 110               | 7409.8  | A         | 7736.9 |

|           |     |                                    |                                      |                                 |     |        |   |        |
|-----------|-----|------------------------------------|--------------------------------------|---------------------------------|-----|--------|---|--------|
| HCoV-OC43 | N   | ACGTTGGATGTCTTAT<br>GACCACYCTGACGC | ACGTTGGATGGCTATA<br>ACGGCGCAATTAGG   | TAGGCCCATCTTGT<br>TGTTGA        | 167 | 6114.0 | T | 6385.2 |
| RSV-A     | N   | ACGTTGGATGCCTRIG<br>GTAGAAGYTTGTGC | ACGTTGGATGCCCAAG<br>GATATAGCRAACAG   | CAAAATAGAAGATT<br>GTGCTATAC     | 122 | 7079.6 | C | 7326.8 |
| RSV-B     | N   | ACGTTGGATGGCACAT<br>CATAATTGYGAGTG | ACGTTGGATGAATAAG<br>GATCAGCTGCTITC   | ACGCAATATTATCT<br>CCTGTACT      | 106 | 6644.3 | A | 6971.4 |
| PIV1      | HN  | ACGTTGGATGGCAAAG<br>RAGAGATCTCACAC | ACGTTGGATGCAATYG<br>TGTTCTCGCATATC   | AAACAGAAGTCAT<br>GCAAC          | 100 | 5509.6 | A | 5780.8 |
| PIV2      | HN  | ACGTTGGATGCAGCTT<br>TTGCGATTGATTCC | ACGTTGGATGGGGATA<br>ATACAYCAATCTGC   | CTTAGCGATTGATT<br>CCATCA        | 111 | 6067   | C | 6354.2 |
| PIV3      | HN  | ACGTTGGATGCTTGTT<br>GTTGAGATTGYGCC | ACGTTGGATGTGCATC<br>ATCAGGRATAGAAG   | TTAAGCCATCATAA<br>TTGACAATATC   | 89  | 7608.0 | A | 7935.1 |
| PIV4      | HN  | ACGTTGGATGATATAR<br>TCGACCRTCTGCAC | ACGTTGGATGGGGAG<br>ACTTATACAGAGTGC   | CCCAGAAAGTTAAA<br>ATTTCAATCTT   | 141 | 8210.4 | T | 8481.6 |
| HMPV-A    | N   | ACGTTGGATGACCCTC<br>ATCATTYCAACAAG | ACGTTGGATGTCTCTG<br>ARCCTAYAGCTGTG   | AGGCGAAATATTAC<br>AAATATGCTGCA  | 146 | 8011.3 | G | 8298.5 |
| HMPV-B    | N   | ACGTTGGATGTCTCYC<br>CACACAAAYGTGTT | ACGTTGGATGAAAAG<br>AGATGTAGGCACCAC   | GTTGCAATGATGAA<br>GGT           | 97  | 5289.5 | G | 5536.6 |
| HBoV1     | NP1 | ACGTTGGATGACAGAA<br>ATATGTTCTYGCAC | ACGTTGGATGGTCTGC<br>TTCTGTCTCRGTGAGG | GGTGTGAAAGATGT<br>AATTACT       | 135 | 6524.3 | G | 6811.5 |
| HBoV2     | NP1 | ACGTTGGATGGGCAGC<br>TACTTRACTGACTC | ACGTTGGATGTTTTCC<br>TCCWGCYTTGCTTG   | AACAAAATGAAGTT<br>CTTAGTTAAAATA | 141 | 8322.5 | C | 8569.7 |
| HBB       |     | ACGTTGGATGAAAGCA<br>GCACTTGACTAGAG | ACGTTGGATGGCTAAA<br>ATGTCTCACTGGG    | ACCTAGAGTATTTT<br>TATACATGCTCT  | 97  | 7910.2 | A | 8237.3 |
| RNaseP    |     | ACGTTGGATGTGAATA<br>GCCAAGGTGAGCGG | ACGTTGGATGCGGTGT<br>TTGCAGATTTGGAC   | CAAGTCCCTGTCTC<br>CA            | 109 | 4777.1 | C | 5064.3 |

\*Flu-A: Influenza virus A; Flu-B: Influenza virus B; PIV: parainfluenza virus; HCoV: human coronavirus; HEV: human enterovirus; HRV: human rhinovirus; AdV: adenovirus; HMPV: human metapneumovirus; RSV: respiratory syncytial virus; HBoV: human bocavirus

#10 mer tag=ACGTTGGATG placed at 5'-end of each primer.

Table S3. The experimental procedure of CRV-MS method

| Experimental procedure                                                                                                                                                                                                                                                                                                                                                                                                                                | Cycle conditions/instrument                                                                                                                                                     |
|-------------------------------------------------------------------------------------------------------------------------------------------------------------------------------------------------------------------------------------------------------------------------------------------------------------------------------------------------------------------------------------------------------------------------------------------------------|---------------------------------------------------------------------------------------------------------------------------------------------------------------------------------|
| <p><b>Primary PCR</b></p> <p><b>Mastermix:</b></p> <p>Total Reaction volume: 5 <math>\mu</math>L, Containing:</p> <ul style="list-style-type: none"> <li>• 2 <math>\mu</math>L DNA template</li> <li>• 500 nM of each primer</li> <li>• 500 <math>\mu</math>M of each dNTP (dATP, dCTP, dGTP, dUTP)</li> <li>• 0.2 U Sequenom PCR Enzyme</li> <li>• 10x PCR Buffer</li> <li>• 4 mM MgCl<sub>2</sub></li> <li>• 0.2U Uracil-DNA Glycosylase</li> </ul> | <p>45°C for 2 min</p> <p>95°C for 4 min</p> <p>95°C for 30 s</p> <p>56°C for 30 s</p> <p>72°C for 1 min</p> <p>72°C for 5 min</p> <p style="text-align: right;">} 45 cycles</p> |
| <p><b>SAP Treatment (2<math>\mu</math>L)</b></p> <ul style="list-style-type: none"> <li>• 10x PCR Buffer</li> <li>• SAP</li> </ul>                                                                                                                                                                                                                                                                                                                    | <p>37°C for 40 min</p> <p>85°C for 5 min</p> <p>1 cycle</p>                                                                                                                     |
| <p><b>iPLEX Pro Extend Reaction (2<math>\mu</math>L)</b></p> <ul style="list-style-type: none"> <li>• 10x PCR Buffer</li> <li>• ThermoSequenase Termination Mix</li> <li>• Extension Primer Mix</li> <li>• 1.35U ThermoSequenase</li> </ul>                                                                                                                                                                                                           | <p>95°C for 30s</p> <p>95°C for 5s</p> <p>52°C for 5s</p> <p>80°C for 5s</p> <p>72°C for 30s</p> <p style="text-align: right;">} 5cycles } 40cycles</p>                         |
| <p><b>Desalting</b></p> <ul style="list-style-type: none"> <li>• 6 mg Clean Resin to each 384-well plate</li> </ul>                                                                                                                                                                                                                                                                                                                                   |                                                                                                                                                                                 |

|                                                                                                                                       |                                                                                                                  |
|---------------------------------------------------------------------------------------------------------------------------------------|------------------------------------------------------------------------------------------------------------------|
| <b>Sample dispensing</b> <ul style="list-style-type: none"><li>• 10 nl of each iPLEX product onto a 384-spot SpectroChip II</li></ul> | MassARRAY Nanodispenser RS 1000 instrument (Sequenom Inc.).                                                      |
| <b>Data acquisition</b>                                                                                                               | MassARRAY MALDI-TOF MS<br>SpectroAcquire software<br>MassARRAY Typer software, version 4.0.3<br>(Sequenom Inc.). |

**Figure S1**

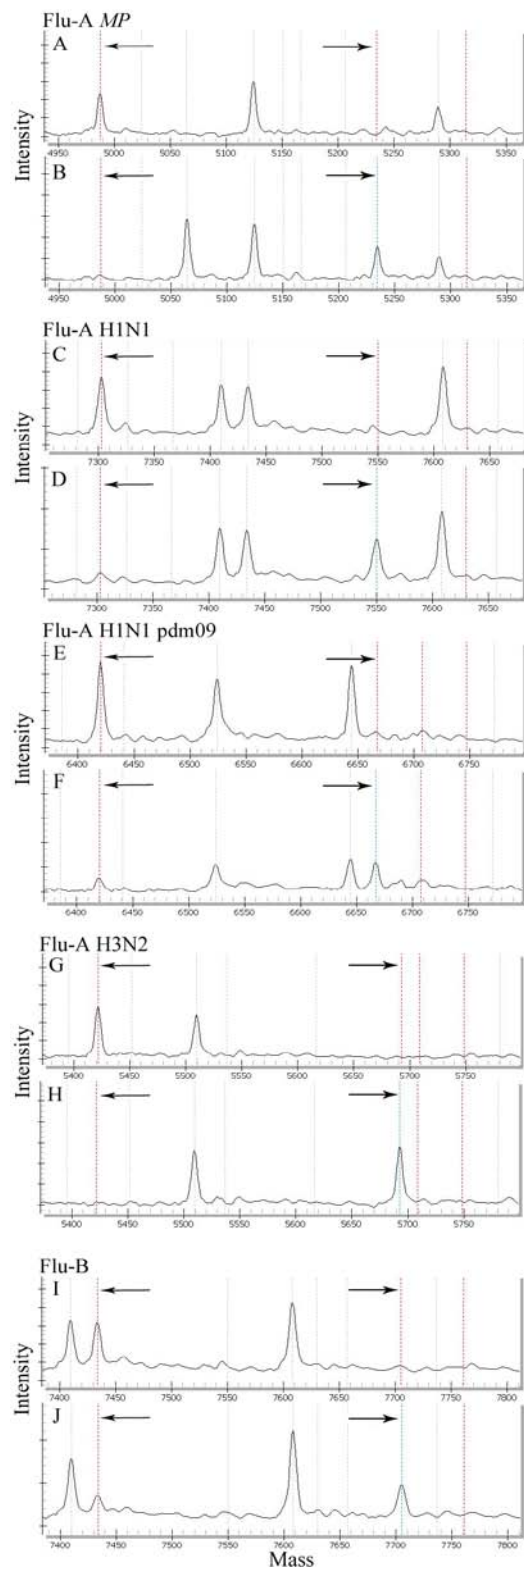

Figure S1. Detection of influenza virus A (Flu-A) and influenza virus B (Flu-B) using the CRV-MS method. In the mass spectrometry mass spectra, the dotted lines in the left and the dotted lines in the right represent the unextended primers and the extended primers of the assay, respectively. A: Flu-A *MP* negative; B: Flu-A *MP* positive; C: Flu-A H1N1 negative; D: Flu-A H1N1 positive; E: Flu-A H1N1 pdm09 negative; F: Flu-A H1N1 pdm09 positive; G: Flu-A H3N2 negative; H: Flu-A H3N2 positive; I: Flu-B negative; J: Flu-B positive.



**Figure S2**

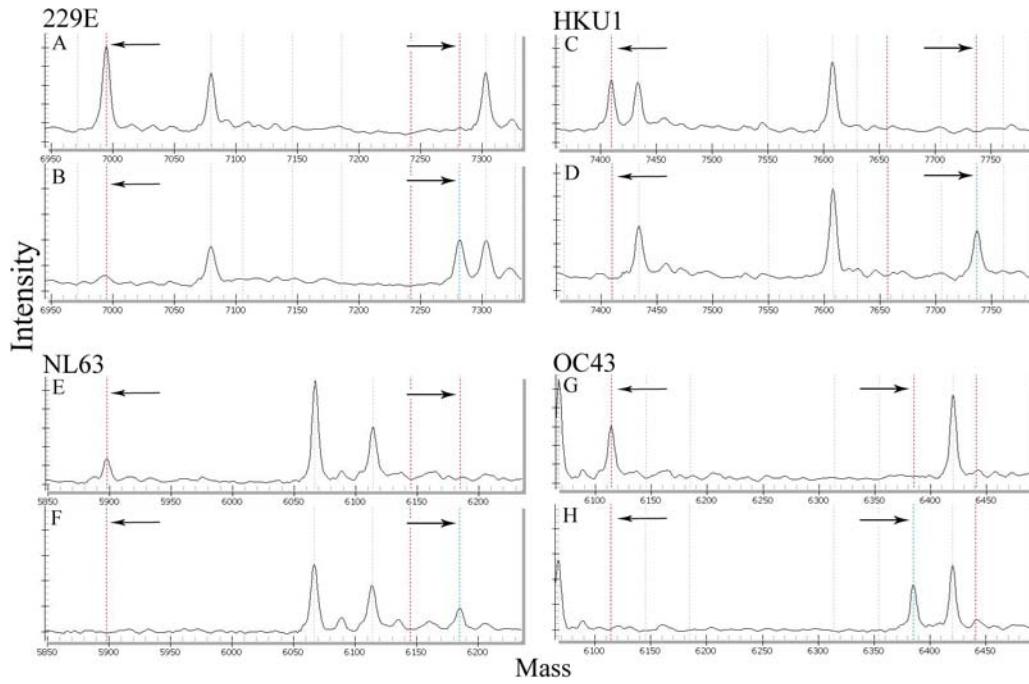

Figure S2. Detection of human coronavirus (HCoV) using the CRV-MS method. In the mass spectrometry mass spectra, the dotted lines in the left and the dotted lines in the right represent the unextended primers and the extended primers of the assay, respectively. A: HCoV-229E negative; B: HCoV-229E positive; C: HCoV-HKU1 negative; D: HCoV-HKU1 positive; E: HCoV-NL63 negative; F: HCoV-NL63 positive; G: HCoV-OC43 negative; H: HCoV-OC43 positive.

**Figure S3**

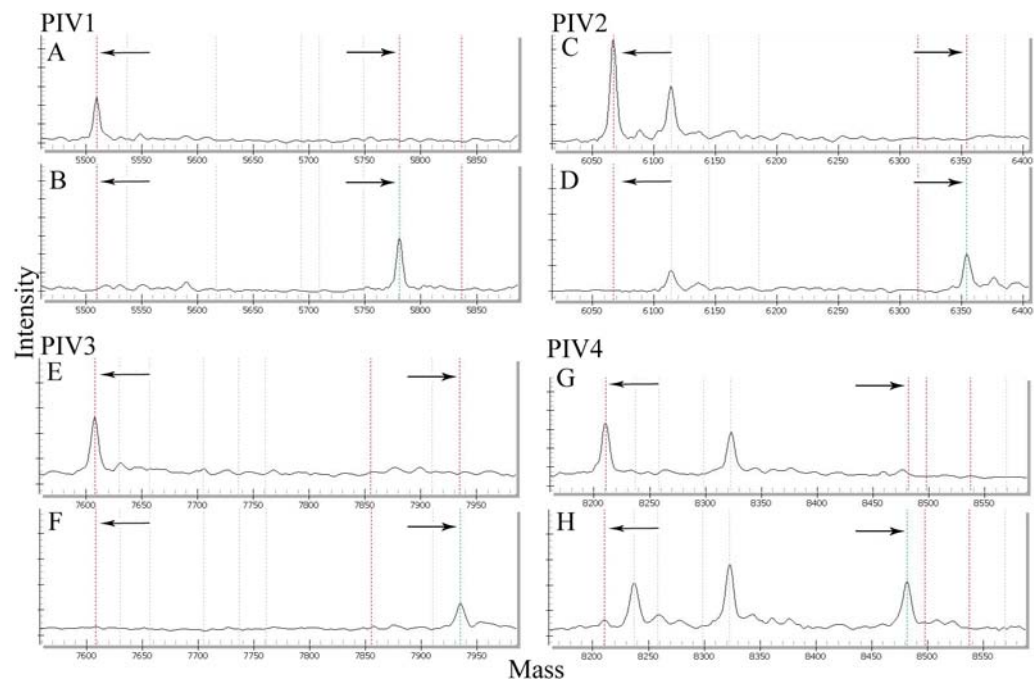

Figure S3. Detection of parainfluenza virus (PIV) using the CRV-MS method. In the mass spectrometry mass spectra, the dotted lines in the left and the dotted lines in the right represent the unextended primers and the extended primers of the assay, respectively. A: PIV1 negative; B: PIV1 positive; C: PIV2 negative; D: PIV2 positive; E: PIV3 negative; F: PIV3 positive; G: PIV4 negative; H: PIV4 positive.

**Figure S4**

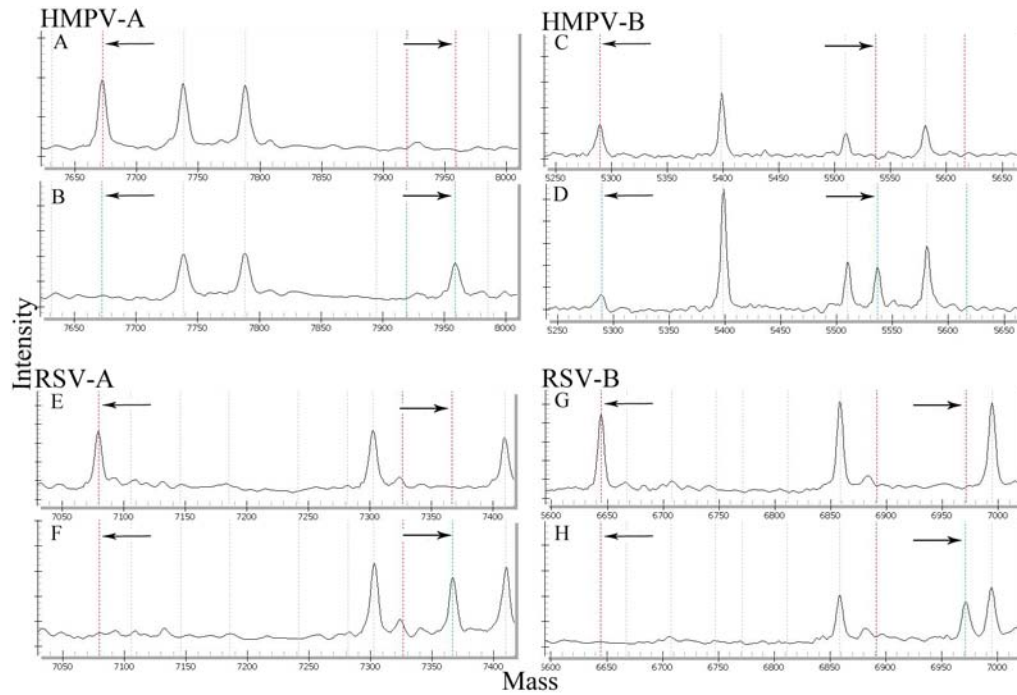

Figure S4. Detection of human metapneumovirus (HMPV) and respiratory syncytial virus (RSV) using the CRV-MS method. In the mass spectrometry mass spectra, the dotted lines in the left and the dotted lines in the right represent the unextended primers and the extended primers of the assay, respectively. A: HMPV-A negative; B: HMPV-A positive; C: HMPV-B negative; D: HMPV-B positive; E: RSV-A negative; F: RSV-A positive; G: RSV-B negative; H: RSV-B positive.

**Figure S5**

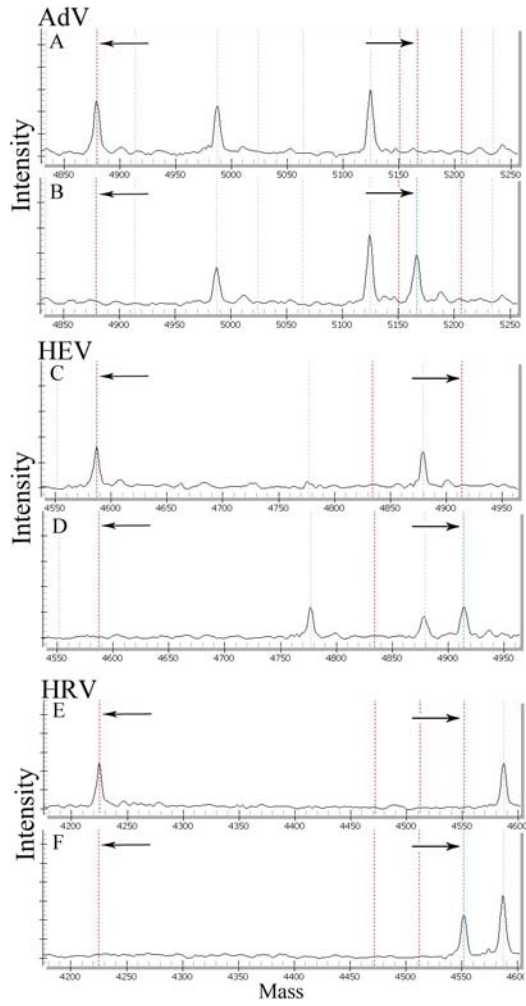

Figure S5. Detection of adenovirus (AdV), human enterovirus (HEV) and human rhinovirus (HRV) using the CRV-MS method. In the mass spectrometry mass spectra, the dotted lines in the left and the dotted lines in the right represent the unextended primers and the extended primers of the assay, respectively. A: AdV negative; B: AdV positive; C: HEV negative; D: HEV positive; E: HRV negative; F: HRV positive.
